# Supplementary material for: Assessment of Physiological Rat Kidney Ageing—Implications for the Evaluation of Allograft Quality Prior to Renal Transplantation
Source: MDPI journal article supplement (doi:10.3390/metabo12020162), 2022-02-08
Supplement: s1 [file s1]

# Supplementary data

**Table S1.** Forward and reverse primers used for RT-qPCR

| Gen              | forward-Primer                 | reverse-Primer               |
|------------------|--------------------------------|------------------------------|
| TGF- $\beta$ 1   | 5'-gcggactactacgccaaga-3       | 5'-actgctcccgaatgtctga-3     |
| TGF- $\beta$ 2   | 5'-cgaggagtactacgccaagg-3      | 5'-aggtagccacagagcacctg-3    |
| TGF- $\beta$ 3   | 5'-ggagttgctggaagagatgc-3      | 5'-gtaattcccttggggcagac-3    |
| Smad2            | 5'-ccaggctcttgatggctgt-3       | 5'-gagctcatgatggctgtgaa-3    |
| Smad3            | 5'-cattaccatcccagggtcac-3      | 5'-tgttgaaggcgaactcacag-3    |
| Smad4            | 5'-tcagtctgtctgtctgtct-3       | 5'-cggtaggagtgatctcaat-3     |
| Smad7            | 5'-ccaactgcagactgtccaga-3      | 5'-caggctccagaagaagttgg-3    |
| TLR1             | 5'-tcttaccctgaacaactggacac-3   | 5'-aagcatgtggaccatgcgtgttc-3 |
| TLR2             | 5'-aagaggaagccaagaagc-3        | 5'-tgaagggtgggtcagagttc-3    |
| TLR3             | 5'-cttgcggtactgtctattca-3      | 5'-ctgctcacctgtgcatcta-3     |
| TLR4             | 5'-cgctctggcatcatctcat-3       | 5'-ctcctcaggtcaagttgttg-3    |
| TLR5             | 5'-ggatcatggcgtatcagctt-3      | 5'-acgatgtggtagacaaccga-3    |
| TLR6             | 5'-ggctggcctgactcttacag-3      | 5'-cagccagtagcagcagagtg-3    |
| TLR7             | 5'-atgccaccgaatctaagac-3       | 5'-gttgtggctgaggtccaat-3     |
| TLR8             | 5'-tggacttggggagaaatgag-3      | 5'-aagccagcaggtaggtgaga-3    |
| TLR9             | 5'-agcactccgtctcaaagaa-3       | 5'-tgacgaacatctctggcttg-3    |
| TLR10            | 5'-ctgtgaggagattggcaaca-3      | 5'-gcaggctgccttctcatag-3     |
| TLR11            | 5'-ggttctactctgccagaa-3        | 5'-ttggcaagtagatgctgtgg-3    |
| TLR12            | 5'-gcccatgtatctgaccagcttagag-3 | 5'-actgaagtttggggagctgcaga-3 |
| CCL2             | 5'-atgcagttaatgcccactc-3       | 5'-ttcctattggggtagcac-3      |
| CCL5             | 5'-atatggctcggacaccactc-3      | 5'-tgacaaagacgactgaagg-3     |
| ICAM             | 5'-tgtgtattcgttcccagagc-3      | 5'-actactgagagctgtgtccg-3    |
| VCAM             | 5'-ggagtgaatctggtgggag-3       | 5'-tgtcagaacaacggaatccc-3    |
| MyD88            | 5'-atgaactgaaggaccgcatc-3      | 5'-gatgcctccagttcctttg-3     |
| NF- $\kappa$ B1  | 5'-ggcagacgacgatcctttc-3       | 5'-ggtagggccatctgttgac-3     |
| RelA             | 5'-tcagttagccatggagtc-3        | 5'-catgatgctcttgaaggtctcg-3  |
| Fibrinogen beta  | 5'-cctacgacagggaacaagat-3      | 5'-tgtaaaggccacccagtag-3     |
| Fibrinogen gamma | 5'-gtgcgaatccatgacacaac-3      | 5'-tttcagatccgtcgatttc-3     |
| HSP22            | 5'-caagccggaagaactgatgg-3      | 5'-ctggatccacttctgcagga-3    |
| HSP27            | 5'-agctcacagtgaagaccaagg-3     | 5'-aagcaccgagagatgtagcc-3    |
| HSP47            | 5'-gggcactgctgttaatgc-3        | 5'-gggtcatcatcgtaacacc-3     |
| HSP60            | 5'-gagaagatcagaaaggggc-3       | 5'-tcagggtgtgtcacaggtt-3     |
| HSP70            | 5'-agggtctcaagggaagatc-3       | 5'-ttctcagccagcgtgttaga-3    |

|        |                             |                            |
|--------|-----------------------------|----------------------------|
| HSP72  | 5'-cgctccaggtgtgatctagg-3   | 5'-ttgcagaccgaacgaaggag-3  |
| HSP96  | 5'-gcaaccagatgtcttggtg-3    | 5'-atgacagtgcctcttctcc-3   |
| HMGB1  | 5'-tgattaatgaatgagttcgggc-3 | 5'-tgctcaggaaactgactgttt-3 |
| Klotho | 5'-gatgttcgtgacagccaatg-3   | 5'-cgcaaagtagccacaaagg-3   |
| TauT   | 5'-attgtcatcctccttgccg-3    | 5'-tctggagtgaaggcgtag-3    |
| CDO    | 5'-tgcctttgaccaacgaacag-3   | 5'-ggcttggcaggtcttagttg-3  |
| CSD    | 5'-cgcatcattacggagagcc-3    | 5'-agggcacggagtcttctcag-3  |
| NFAT5  | 5'-ttaccacggacaacaaaggc-3   | 5'-cttcagctccttccctcac-3   |
| BGT1   | 5'-tctctgctacaagaacgggg-3   | 5'-ctggctgctatactgacca-3   |

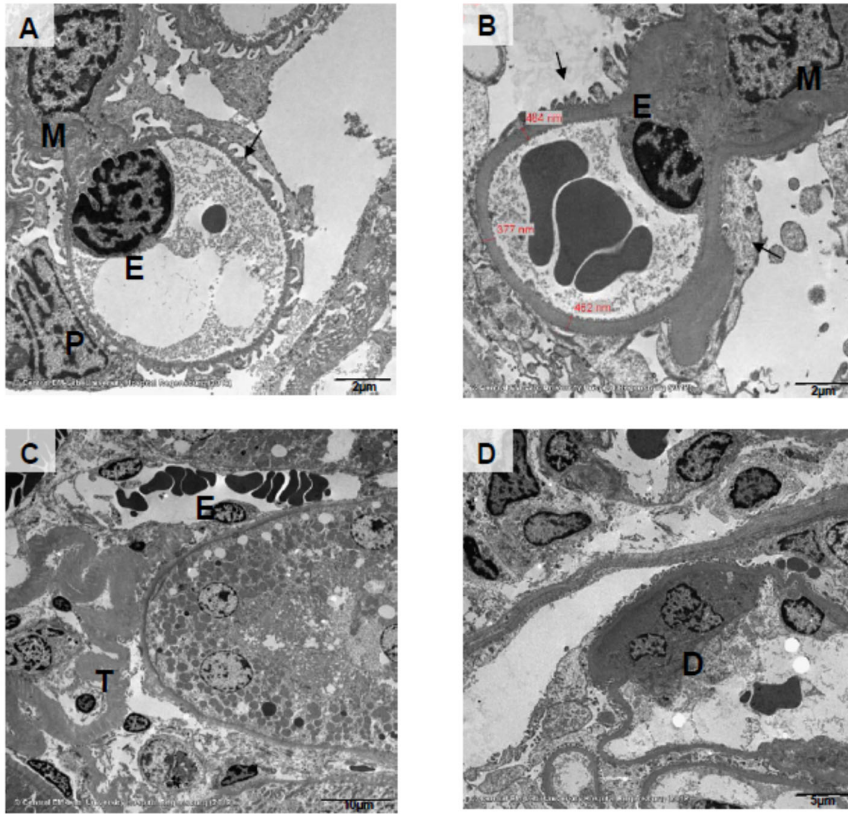

**Figure S1.** Electron microscopy of kidneys of 3- and 24-month-old rats. (A) Glomerular capillary of a 3-month-old rat covered by regular podocyte foot processes, (B) Glomerular capillary of a 24-month-old rat, showing a thickening of the glomerular basement membrane, a focal subepithelial deposit, and segmental effacement of podocyte foot processes; (C) degenerated tubule in the interstitium of a 24-month-old rat. The collapsed tubule wall shows hardly any epithelial cells; (D) focal membranous glomerular deposits and perivascular fibrocytes in the interstitium of a 24-month-old rat, indicative of interstitial fibrosis. Legend: E, endothelial cell; D, deposit; M, mesangial cell; T, tubule; arrow, points to podocyte foot processes. Size scale: bar A and B = 2 $\mu$ m, bar C = 10  $\mu$ m, D = 5 $\mu$ m.
